# Supplementary material for: Engineering cGAS-agonistic oligonucleotides as therapeutics for cancer immunotherapy
Source: PubMed Central journal article supplement — Mol Ther Nucleic Acids. 2024 Jan 24;35(1):102126. doi: 10.1016/j.omtn.2024.102126 (PMC10863322; doi:10.1016/j.omtn.2024.102126), 2024-01-24
Supplement: mmc1.pdf [file mmc1.pdf]

**OMTN, Volume 35**

**Supplemental information**

**Engineering cGAS-agonistic  
oligonucleotides as therapeutics  
for cancer immunotherapy**

**Shurong Zhou, Ting Su, Furong Cheng, Janet Cole, Xiang Liu, Bei Zhang, Shaheer Alam, Jinze Liu, and Guizhi Zhu**

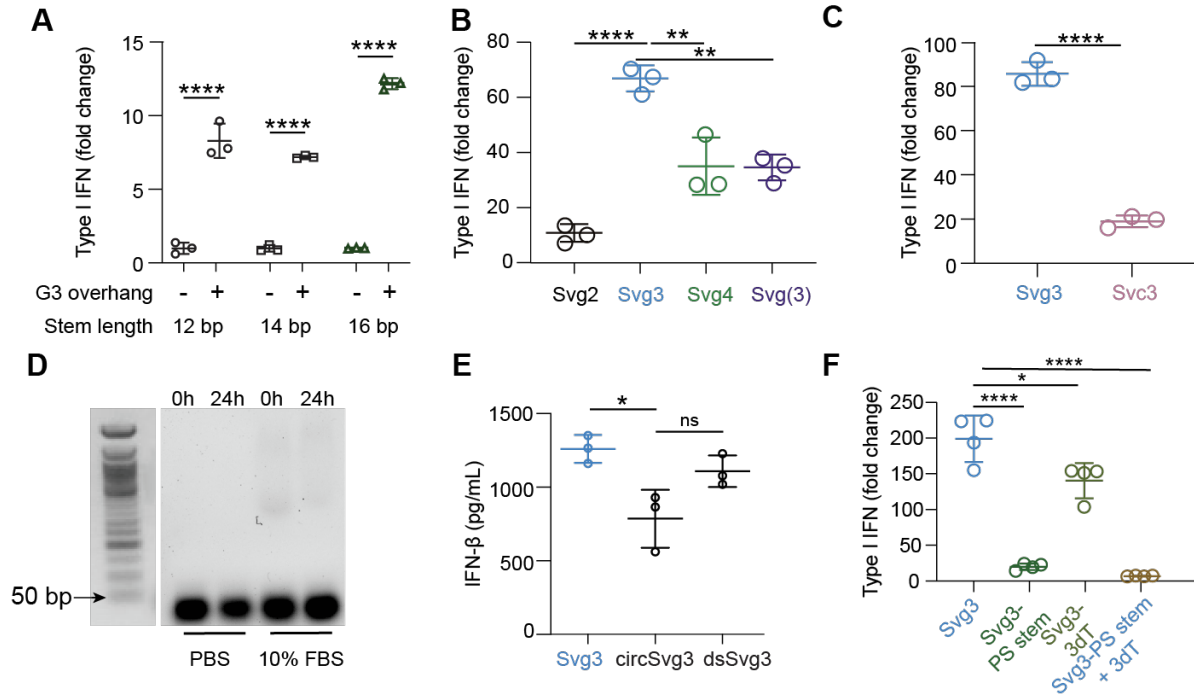

**Figure S1. Screening for and characterization of Svg3 as a cGAS agonist.** A) IFN-I response in Raw-ISG cells after 24 h transfection with short hairpin DNAs with or without consecutive guanosine in the overhangs. B) IFN-I response in Raw-ISG cells after 24 h transfection with different G content in the overhangs of short hairpin DNAs. C) Comparison of IFN-I response in Raw-ISG cells of hairpin DNA containing consecutive guanosine or cytosine in the overhangs. D) Integrity of Svg3 after incubation in PBS or cell culture medium containing 10% FBS for 24 h verified by 2% agarose gel electrophoresis. E) IFN-β expression in Raw 264.7 cells after transfection of Svg3, circularized Svg3 or double-stranded Svg3 (with two open overhangs) respectively, for 24 h. F) IFN-I response in Raw-ISG cells after 24 h transfection of chemically modified Svg3.

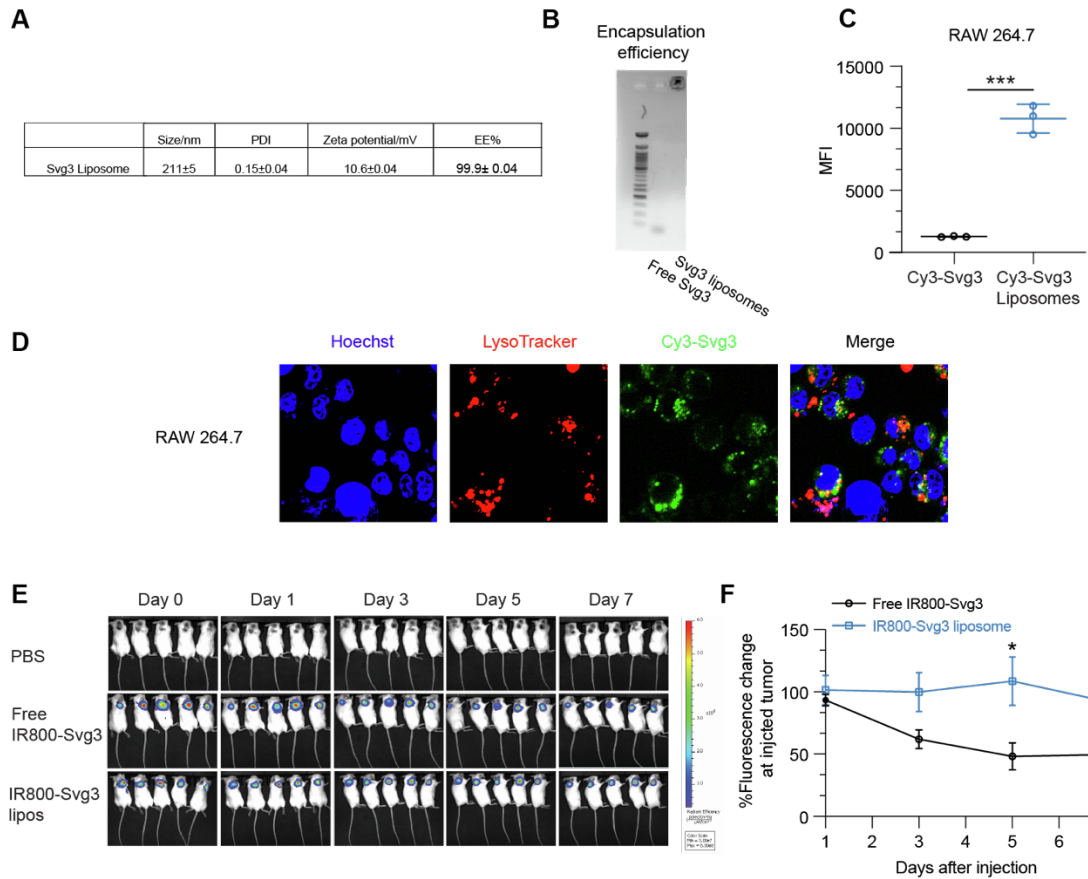

**Figure S2. Liposomes readily loaded Svg3 for efficient delivery and retention of Svg3 in tissues and cells.** A) Characterization of the size, polydispersity index (PDI), zeta potential and encapsulation efficiency (EE%) of nanoparticles used in the study. B) Encapsulation efficiency of Svg3 liposomes evaluated by 2% agarose gel electrophoresis. C) Median Cy3 fluorescence intensity from Cy3-Svg3 loaded in liposomes. D) Confocal images of RAW 264.7 cells after incubated with liposomal Cy3-Svg3 for 5 h. E) IVIS imaging of 4T1 tumors after i.t. injection of liposomal IR800-Svg3. F) Fluorescence intensities of 4T1 tumors quantified from IVIS imaging results.

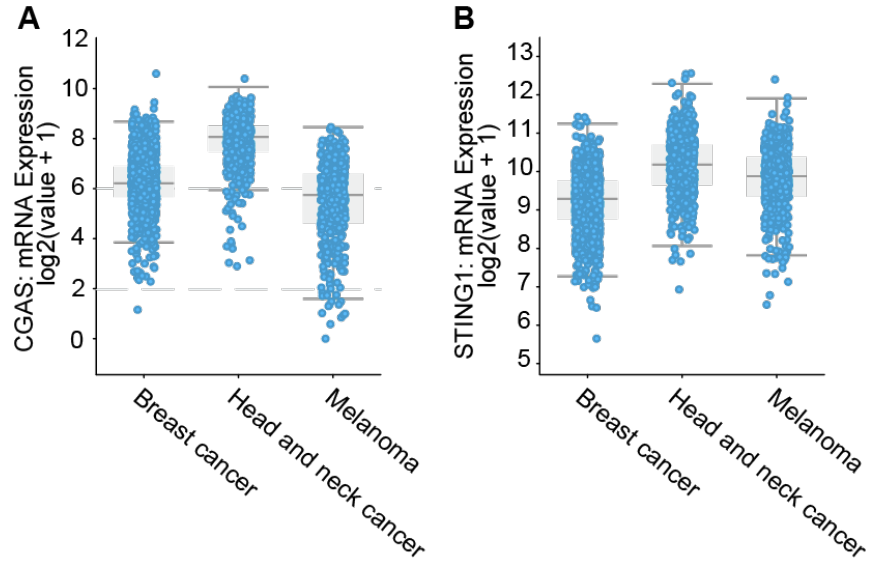

**Figure S3.** The transcript levels of *cGas* (A) and *Sting* (B) in the indicated three types of human cancers. Human transcript data were downloaded from cBioPortal.

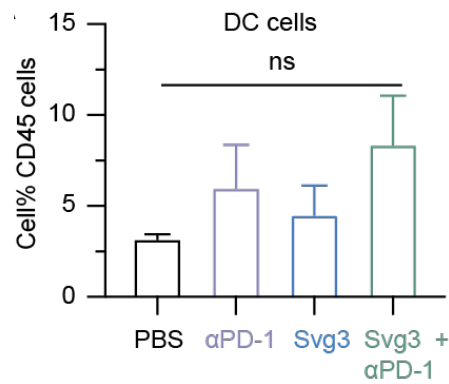

**Figure S4.** Percentages of DC cells among CD45<sup>+</sup> cells in as-treated 4T1 tumors.

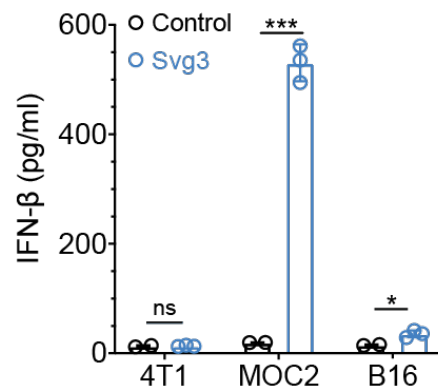

**Figure S5.** Svg3 elicited different levels of IFN-I responses in three types of murine tumor cells, as shown by the IFN- $\beta$  levels in the culture medium after Svg3 transfection (500 nM, 24 h).

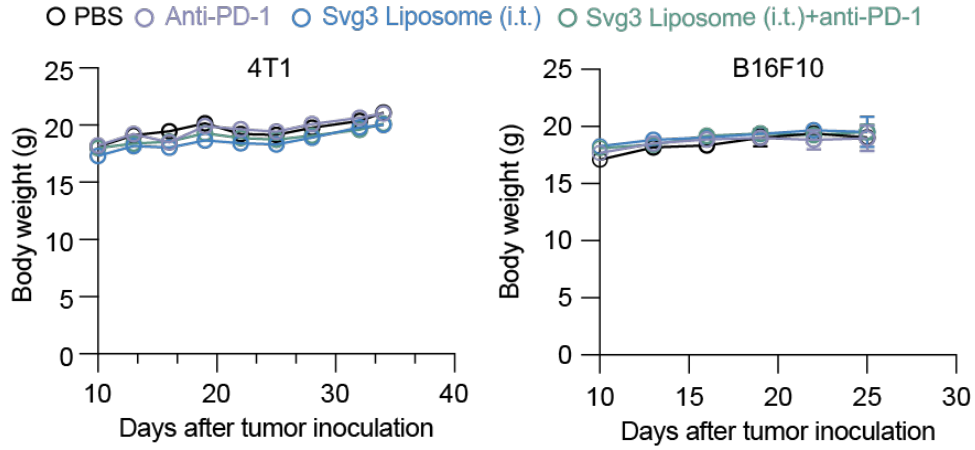

**Figure S6.** Mouse body weights during the course of tumor therapy using the indicated treatments.

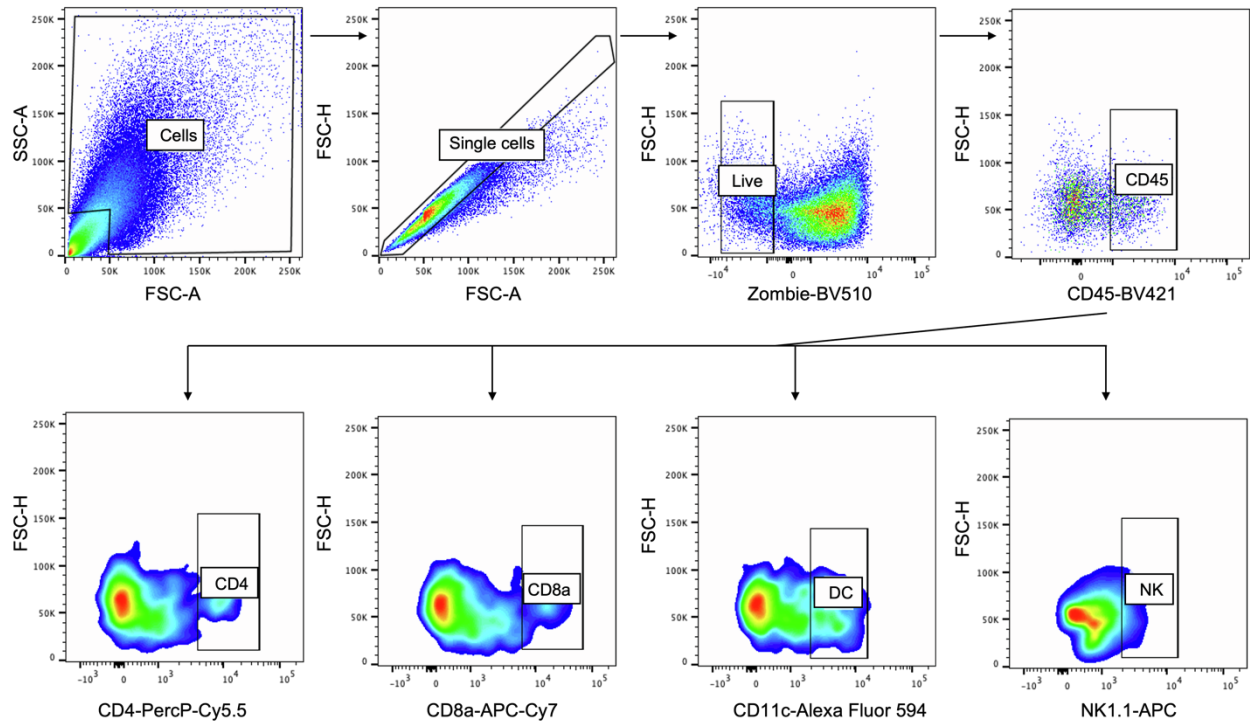

**Figure S7.** Flow cytometry gating trees for the analysis of CD4<sup>+</sup> T cells, CD8<sup>+</sup> T cells, DCs, and NK cells in 4T1 tumor microenvironment.

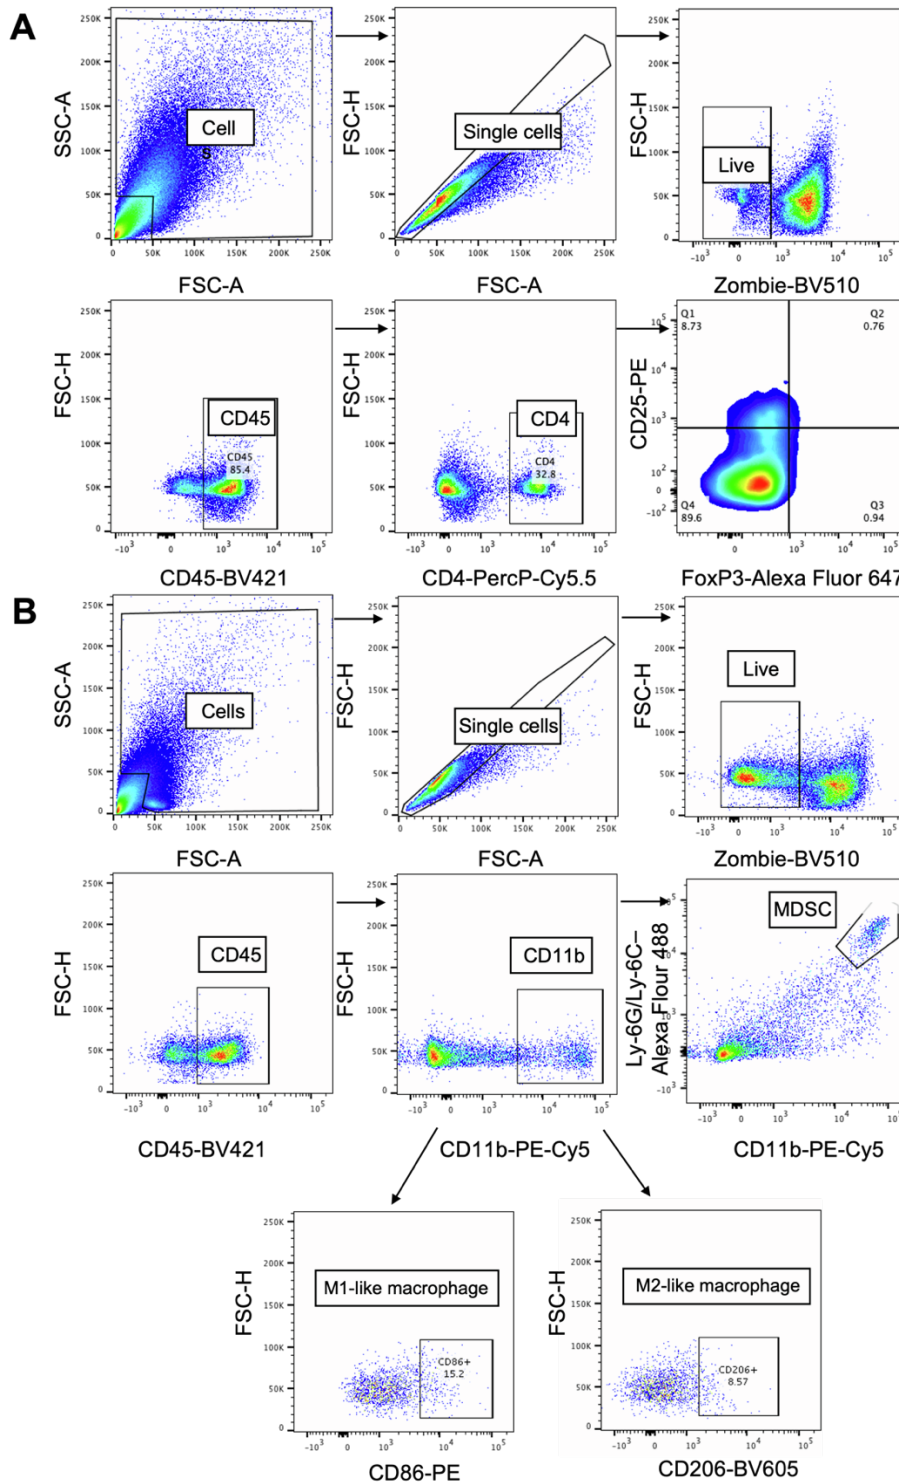

**Figure S8.** A) Flow cytometry gating strategy for regulatory T cells among CD4<sup>+</sup> T cells in 4T1 tumor microenvironment analysis. B) Flow cytometry gating strategy for myeloid derived suppressor cells, M1-like macrophage and M2-like macrophage in 4T1 tumor microenvironment analysis.

**Table S1. DNA sequences used for oligonucleotide engineering and screening.**

| Name                        | Sequence (5'-3')                                                                                                                          |
|-----------------------------|-------------------------------------------------------------------------------------------------------------------------------------------|
| <b>Svg3</b>                 | CAG GGG GGA CCA CTC TTA AGC CTC AAG GGA AGC TGG GTT GAG<br>GCT TAA GAG TGG TCC CGG GT                                                     |
| <b>Svg3-PS<br/>stem</b>     | CAG GGG* G*G*A* C*C*A* C*T*C* T*T*A* A*G*C* C*T*C* A*AG<br>GGA AGC TGG G*T*T* G*A*G* G*C*T* T*A*A* G*A*G* T*G*G*<br>T*C*C* CGG GT         |
| <b>Svg3-3dT</b>             | CAG GGG GGA CCA CTC TTA AGC CTC AAG GGA AGC TGG GTT GAG<br>GCT TAA GAG TGG TCC CGG GT /3InvdT/                                            |
| <b>Svg3-PS<br/>stem-3dT</b> | CAG GGG* G*G*A* C*C*A* C*T*C* T*T*A* A*G*C* C*T*C* A*AG<br>GGA AGC TGG G*T*T* G*A*G* G*C*T* T*A*A* G*A*G* T*G*G*<br>T*C*C* CGG GT/3InvdT/ |
| <b>Svc3</b>                 | CAC CCG GGA CCA CTC TTA AGC CTC AAC CCA AGC TCC GTT GAG<br>GCT TAA GAG TGG TCC CCC CT                                                     |
| <b>Svg2</b>                 | CGGGGACCACTCTTAAGCCTCAAGCTGTTGAGGCTTAAGAGTGGTCCC<br>GT                                                                                    |
| <b>Svg(3)</b>               | GGGACCACTCTTAAGCCTCAAGGGAAGCTGGGTTGAGGCTTAAGAGT<br>GGTCCC                                                                                 |
| <b>Svg4</b>                 | CAGGGGGACCACTCTTAAGCCTCAAGGAAGCTGGTGTGAGGCTTAAGA<br>GTGGTCCCGGT                                                                           |
| <b>ISD<br/>(InvivoGen)</b>  | 5'-TACAGATCTACTAGTGATCTATGACTGATCTGTACATGATCTACA-3'<br>3'-ATGTCTAGATGATCACTAGATACTGACTAGACATGTACTAGATGT-5'                                |
| <b>DNA_10<br/>bp</b>        | TAC TCC AAG CAA GCC CGC TTG GAG TAG TCT TG                                                                                                |
| <b>DNA_14<br/>bp</b>        | GTT CTG TTG AGG ATT TAC GGA CAC AAC CGT AAA TCC TCA A                                                                                     |
| <b>DNA_18<br/>bp</b>        | GTT CTG TTG AGG ATT TAC GAG GTCAC ACA AGACC TCG TAA ATC<br>CTC AA                                                                         |
| <b>DNA_20<br/>bp</b>        | GTT CTG TTG AGG ATT TAC GAG GTCGTAC ACA AACGACC TCG TAA<br>ATC CTC AA                                                                     |
| <b>DNA_21<br/>bp</b>        | CAC CCC GGA CCA CTC TTA AGC CTC AAC CCA AGC TCC GTT GAG<br>GCT TAA GAG TGG TCC CCC CT                                                     |
| <b>DNA_22<br/>bp</b>        | GTT CTG CTTTG AGG ATT TAC GAG GTCGTAC ACA AACGACC TCG<br>TAA ATC CTC AAAG                                                                 |
| <b>DNA_24<br/>bp</b>        | GTT CTG AGCTTTG AGG ATT TAC GAG GTCGTAC ACA AACGACC<br>TCG TAA ATC CTC AAAGCT                                                             |

**Table S2. Primer sequences used for qPCR.**

| <i>Human genes</i>     | 5'-3'                     |
|------------------------|---------------------------|
| <i>Gapdh</i> -Forward  | GGAGCGAGATCCCTCCAAAAT     |
| <i>Gapdh</i> -Reverse  | GGCTGTTGTCATACTTCTCATGG   |
| <i>Ifna2</i> -Forward  | GCTTGGGATGAGACCCTCCTA     |
| <i>Ifna2</i> -Reverse  | CCCACCCCCTGTATCACAC       |
| <i>Ifnb</i> -Forward   | ATGACCAACAAGTGTCTCCTCC    |
| <i>Ifnb</i> -Reverse   | GGAATCCAAGCAAGTTGTAGCTC   |
| <i>Il6</i> -Forward    | ACTCACCTCTTCAGAACGAATTG   |
| <i>Il6</i> -Reverse    | CCATCTTTGGAAGGTTCAGGTTG   |
| <i>Cxcl10</i> -Forward | GTGGCATTCAAGGAGTACCTC     |
| <i>Cxcl10</i> -Reverse | TGATGGCCTTCGATTCTGGATT    |
|                        |                           |
| <i>Mouse genes</i>     |                           |
| <i>Gapdh</i> -Forward  | CTTTGTCAAGCTCATTTCTGG     |
| <i>Gapdh</i> -Reverse  | TCTTGCTCAGTGCCTTGC        |
| <i>Tnfa</i> -Forward   | GGTGCCTATGTCTCAGCCTCTT    |
| <i>Tnfa</i> -Reverse   | GCCATAGAAGTATGAGAGGGAG    |
| <i>Il6</i> -Forward    | GAGGATAACCACTCCCAACAGACC  |
| <i>Il6</i> -Reverse    | AAGTGCATCATCGTTGTTTCATACA |
| <i>Cxcl10</i> -Forward | ATCATCCCTGCGAGCCTATCCT    |
| <i>Cxcl10</i> -Reverse | GACCTTTTTTGGCTAAACGCTTTC  |



**Table S3. Details of antibodies used in this study.**

| <b>Targets</b>      | <b>Fluorochrome</b>  | <b>Clone</b>  | <b>Vendor</b> | <b>Catalogue #</b> |
|---------------------|----------------------|---------------|---------------|--------------------|
| <b>CD45</b>         | Brilliant Violet 421 | 30-F11        | BioLegend     | 103133             |
| <b>CD11c</b>        | Alexa Fluor 594      | N418          | BioLegend     | 117346             |
| <b>CD11b</b>        | FITC                 | M1/70         | BioLegend     | 101205             |
| <b>CD8a</b>         | APC/Cy7              | 53-6.7        | BioLegend     | 100713             |
| <b>CD4</b>          | PerCP/Cy5.5          | GK1.5         | BioLegend     | 100433             |
| <b>CD103</b>        | Brilliant Violet 605 | 2.00E+07      | BioLegend     | 121433             |
| <b>CD205</b>        | PE/Cy7               | NLDC-145      | BioLegend     | 138209             |
| <b>F4/80</b>        | APC/Cy7              | BM8           | BioLegend     | 123117             |
| <b>CD11b</b>        | PE/Cy5               | M1/70         | BioLegend     | 101209             |
| <b>NK1.1</b>        | APC                  | S17016D       | BioLegend     | 156505             |
| <b>CD3</b>          | PerCP/Cy5.5          | 17A2          | BioLegend     | 100217             |
| <b>CD44</b>         | PE/Cy5               | IM7           | BioLegend     | 103009             |
| <b>CD62L</b>        | FITC                 | MEL-14        | BioLegend     | 104405             |
| <b>CD25</b>         | FITC                 | 3C7           | BioLegend     | 101907             |
| <b>FoxP3</b>        | Alexa Fluor 647      | MF-14         | BioLegend     | 126407             |
| <b>CD279 (PD-1)</b> | N/A                  | RMP1-14-CP162 | Bio X Cell    | CP162              |
